# Supplementary material for: Electronic modulation of cobalt–molybdenum oxideviaTe doping embedded in a carbon matrix for superior overall water splitting
Source: Royal Society of Chemistry journal article supplement (doi:10.1039/d2qi00753c), 2022-01-01
Supplement: d2qi00753c1.pdf [file d2qi00753c1.pdf]

## Supporting Information

### Electronic modulation of cobalt-molybdenum oxide via Te doping embedded in carbon matrix for superior overall water splitting

Luqi Wang<sup>a</sup>, Hanzhi Yu<sup>a</sup>, Sheng Zhao<sup>a</sup>, Hui Ma<sup>b</sup>, Linlin Li<sup>\*a</sup>, Feng Hu<sup>a</sup>, Lei Li<sup>\*b</sup>, Hui Pan<sup>c</sup>, K. M. El-Khatib<sup>d</sup> and Shengjie Peng<sup>\*a</sup>

<sup>a</sup>College of Materials Science and Technology, Nanjing University of Aeronautics and Astronautics, Nanjing 210016, China. E-mails: lili@nuaa.edu.cn pengshengjie@nuaa.edu.cn

<sup>b</sup>College of Biological, Chemical Sciences and Engineering, Jiaying University, 118 Jiahang Road, Jiaying, Zhejiang, 314001, PR China.  
E-mail: leili@mail.zjxu.edu.cn

<sup>c</sup>Institute of Applied Physics and Materials Engineering, University of Macau, Avenida da Universidade, Taipa, Macao 999078, P. R. China

<sup>d</sup>Chemical Engineering and Pilot Plant Department, Engineering Research Institute National Research Centre 33 El-Buhouth St., Dokki, Cairo 12622, Egypt

#### TOF calculation

Turnover frequency (TOF) was calculated via the following formula according to previous reports.

$$\text{TOF per site} = \frac{\# \text{ Total Oxygen Turn Over/cm}^2 \text{ geometric area}}{\# \text{ Surface Sites/cm}^2 \text{ geometric area}}$$

The total number of oxygens turnovers was calculated from the current density using the following equation:

$$\#O_2 = \left( \frac{j}{\text{cm}^2} \right) \left( \frac{1 \text{ C s}^{-1}}{1000 \text{ mA}} \right) \left( \frac{1 \text{ mol s}^{-1}}{1000 \text{ mA}} \right) \left( \frac{1 \text{ mol O}_2}{4 \text{ mol e}^-} \right) \left( \frac{6.022 \times 10^{23} \text{ O}_2 \text{ molecules}}{1 \text{ mol O}_2} \right) = J \times 1.56 \times 10^{15} \frac{\text{O}_2/\text{s}}{\text{cm}^2} \text{ per } \frac{\text{mA}}{\text{cm}^2}$$

The Co content of Te-CoMoO<sub>3</sub>@C is determined by the ICP. The mass loading on the electrode is ~0.30 mg cm<sup>-2</sup>. Thus, n is calculated as:

$$n(\text{Te-CoMoO}_3@\text{C}) = \frac{4.67\% \times 0.30 \frac{\text{mg}}{\text{cm}^2}}{58.93 \frac{\text{g}}{\text{mol}}} = 2.38 \times 10^{-7} \text{ mol/cm}^2$$

$$N_{\text{active}}^{\text{Te-CoMoO}_3@\text{C}} = 6.022 \times 10^{23} \text{ mol}^{-1} \times 2.38 \times 10^{-7} \text{ mol/cm}^2 = 1.433 \times 10^{17} \text{ atoms/cm}^2$$

$$\text{TOF} = \frac{|J| \times 1.56 \times 10^{15} \frac{\text{O}_2/\text{s}}{\text{cm}^2} \text{per} \frac{\text{mA}}{\text{cm}^2}}{N_{\text{active}}^{\text{Te-CoMoO}_3@C}}$$

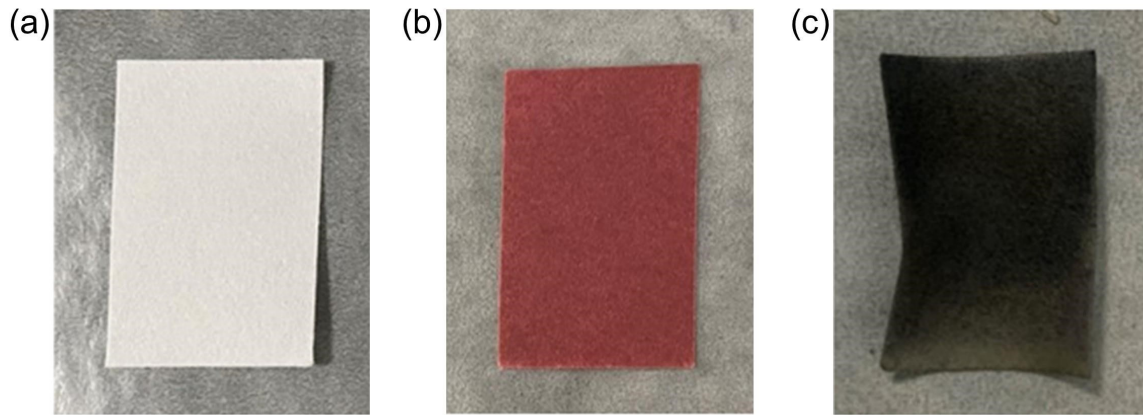

**Fig. S1.** Optical photographs of (a) filter paper, (b) Co/Mo salts adsorbed on the filter paper, and (c) Te-CoMoO<sub>3</sub>@C.

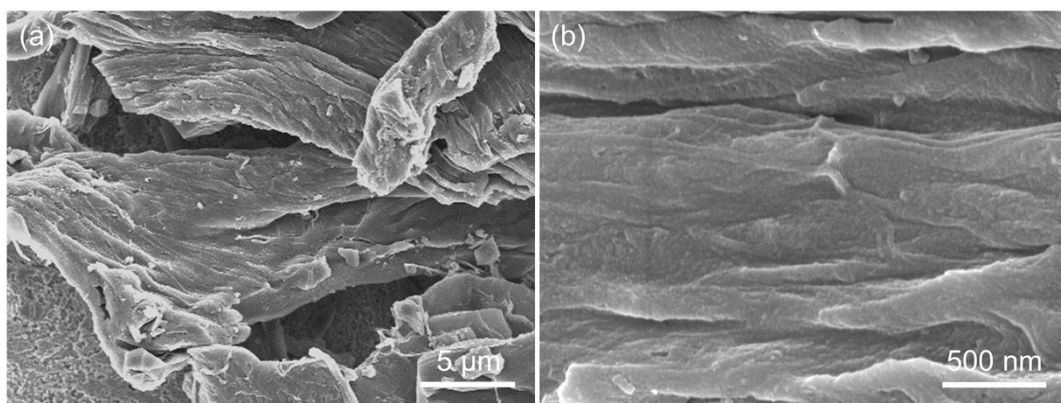

**Fig. S2.** (a) Low-magnified and (b) high-magnified SEM images of calcined filter paper.

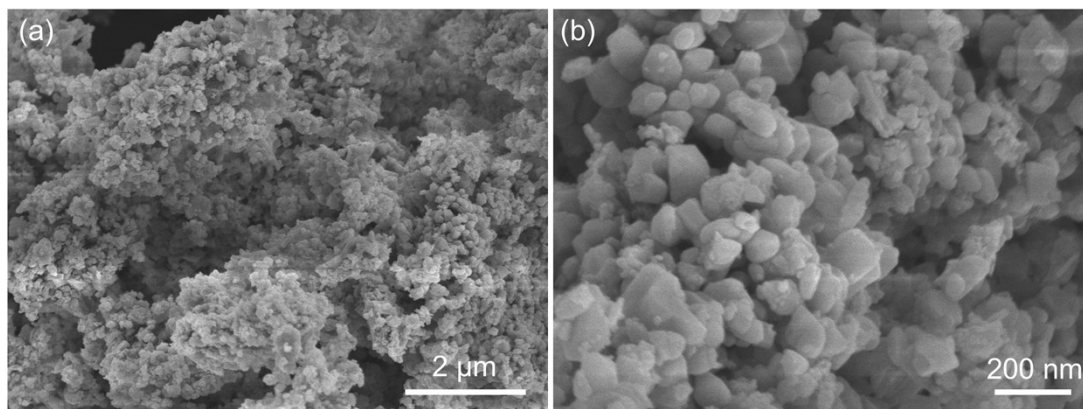

**Fig. S3.** (a) Low-magnified and (b) high-magnified SEM images of CoMoO<sub>3</sub>@C.

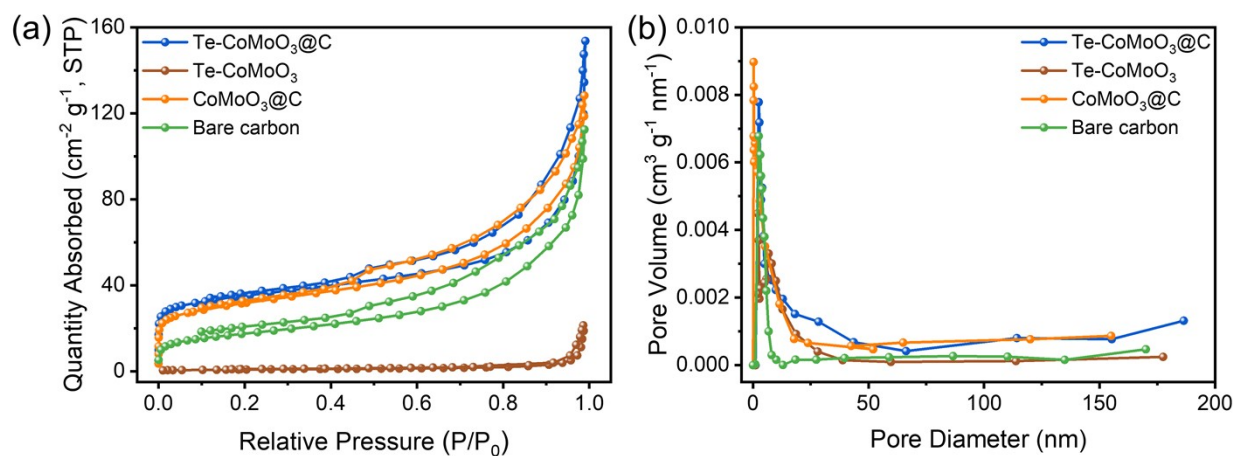

**Fig. S4.** (a) N<sub>2</sub> adsorption/desorption isotherm and (b) the corresponding pore size distribution of Te-CoMoO<sub>3</sub>@C, Te-CoMoO<sub>3</sub>, CoMoO<sub>3</sub>@C, and bare carbon.

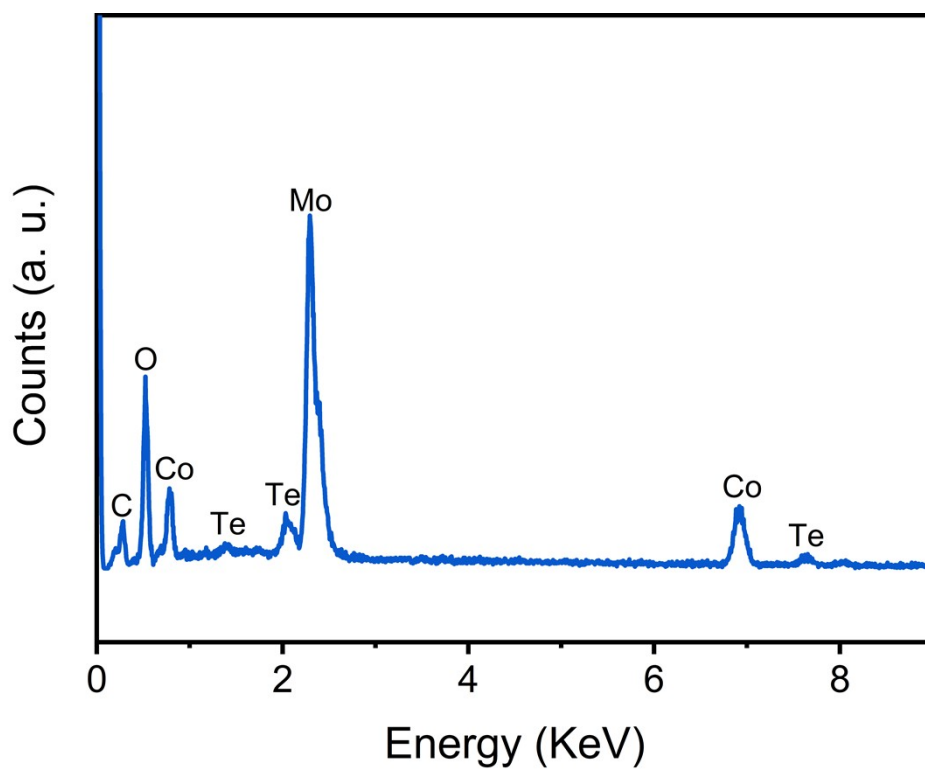

**Fig. S5.** EDX pattern of Te-CoMoO<sub>3</sub>@C.

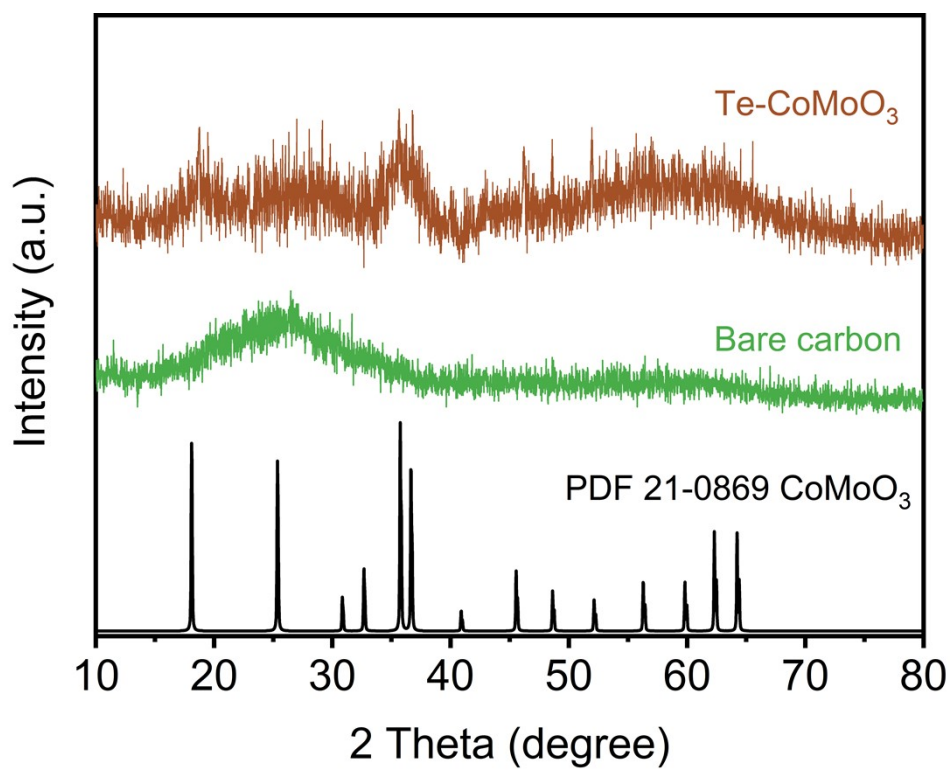

**Fig. S6.** XRD pattern of CoMoO<sub>3</sub>@C and bare carbon.

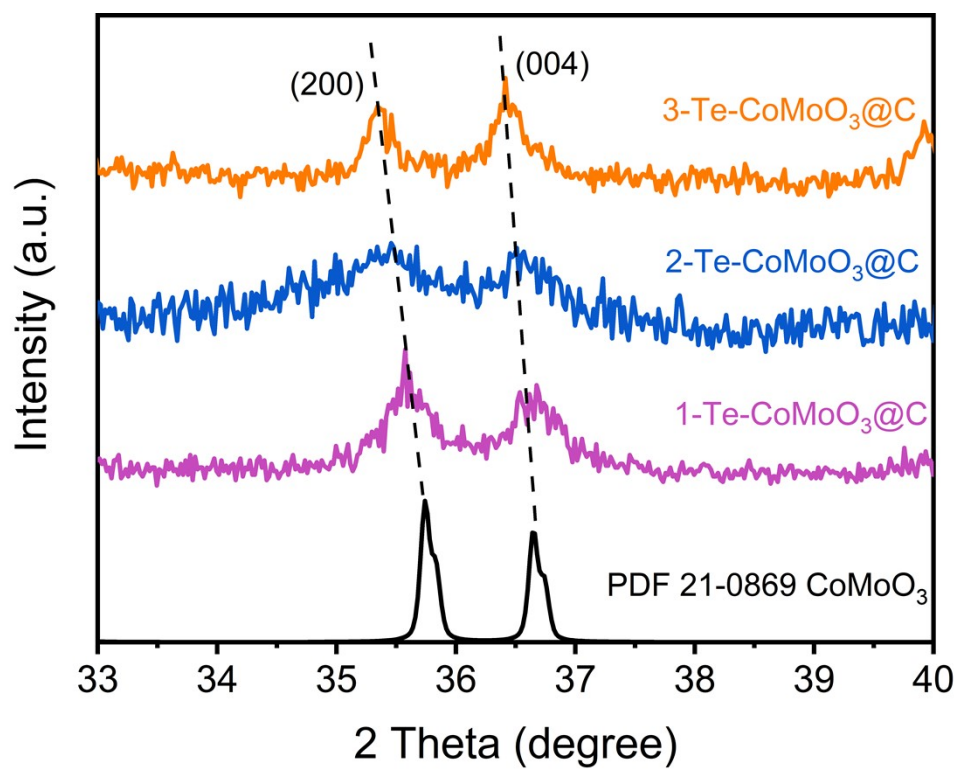

**Fig. S7.** XRD patterns of the Te-CoMoO<sub>3</sub>@C with various doping amounts of Te.



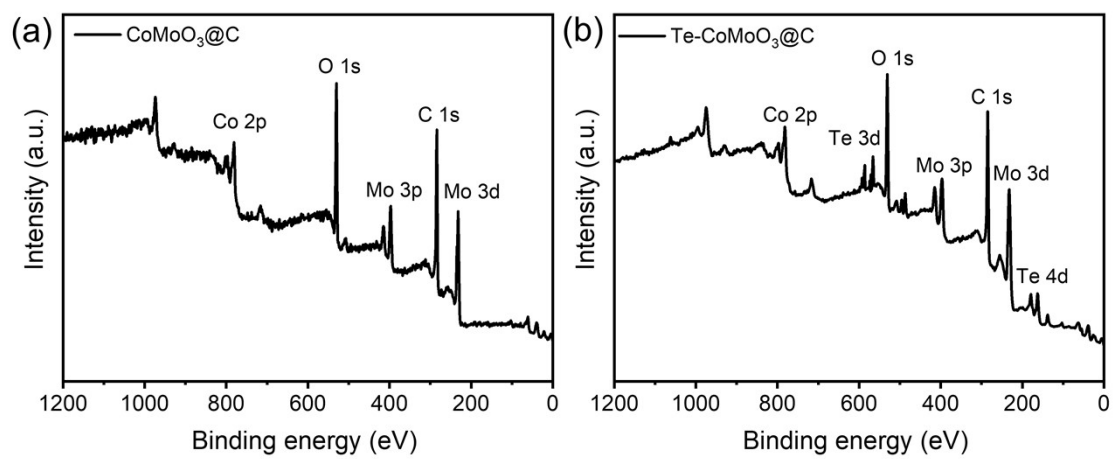

**Fig. S8.** XPS full spectra of (a) CoMoO<sub>3</sub>@C and (b) Te-CoMoO<sub>3</sub>@C.

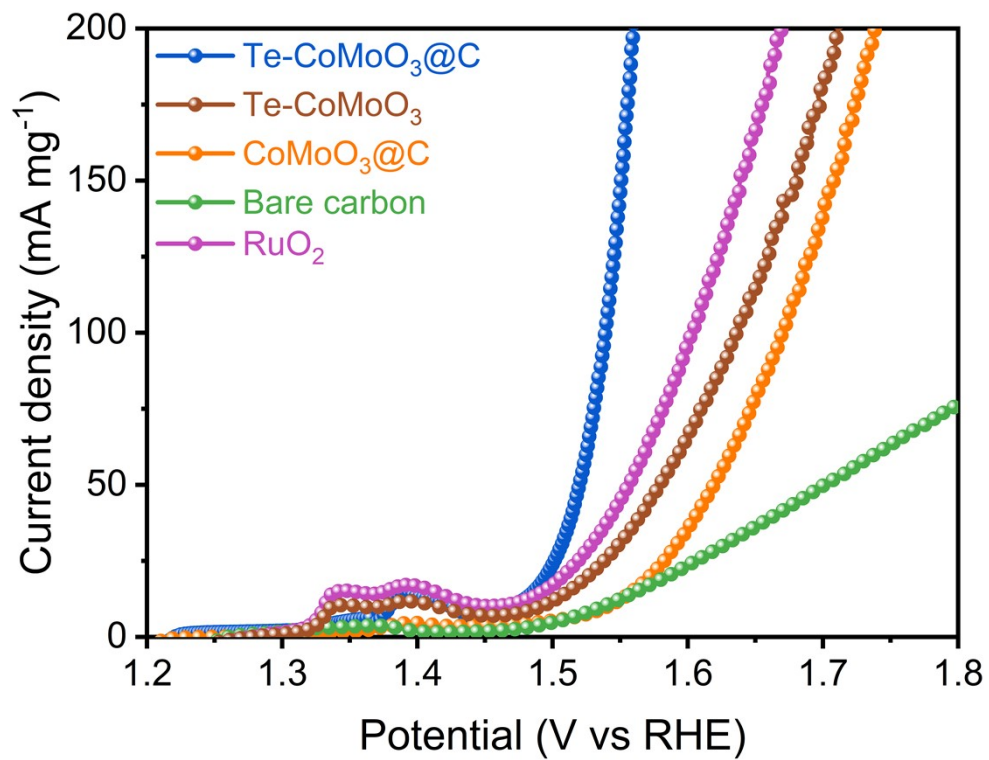

**Fig. S9.** OER LSV polarization curves normalized to catalyst loading of RuO<sub>2</sub>, bare carbon, CoMoO<sub>3</sub>@C, Te-CoMoO<sub>3</sub> and Te-CoMoO<sub>3</sub>@C.

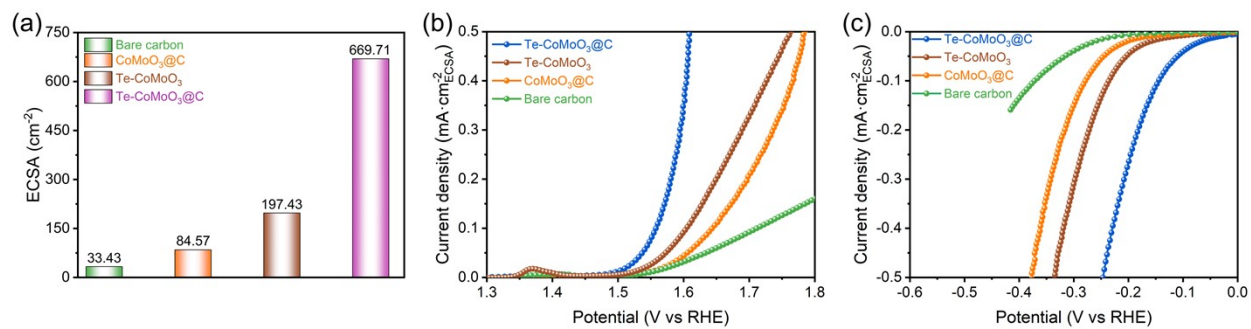

**Fig. S10.** (a) The ECSA of bare carbon, CoMoO<sub>3</sub>@C, Te-CoMoO<sub>3</sub> and Te-CoMoO<sub>3</sub>@C. (b) HER and (c) OER polarization curve normalized by the ECSA for bare carbon, CoMoO<sub>3</sub>@C, Te-CoMoO<sub>3</sub> and Te-CoMoO<sub>3</sub>@C.

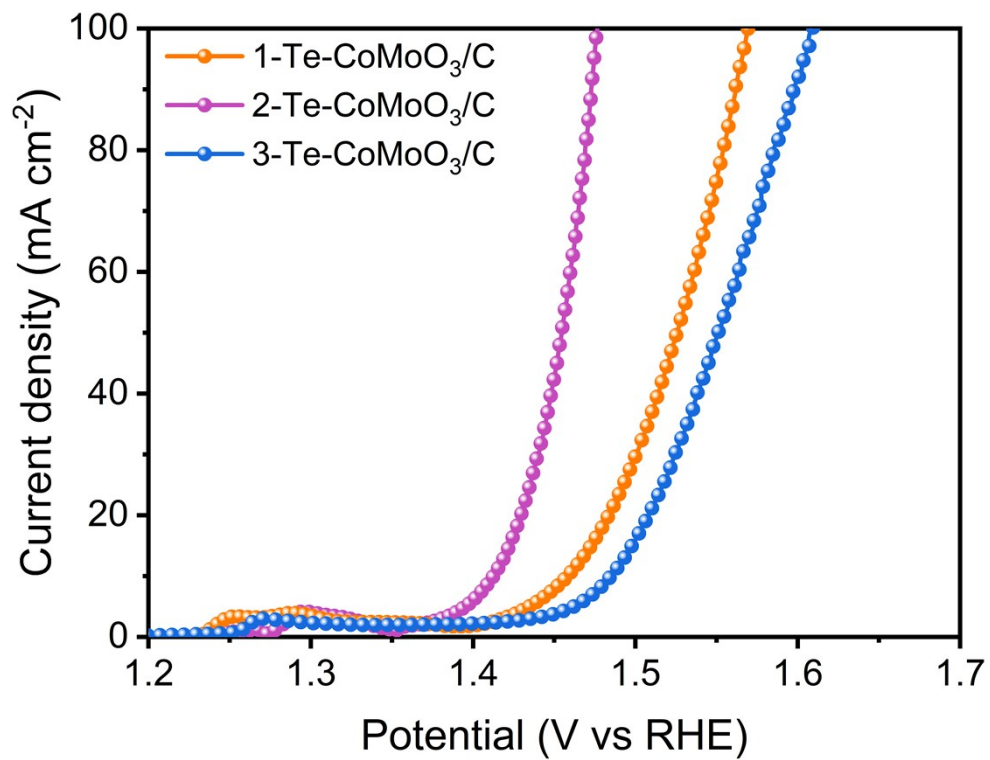

**Fig. S11.** OER performances of 1-Te-CoMoO<sub>3</sub>@C, 2-Te-CoMoO<sub>3</sub>@C, and 3-Te-CoMoO<sub>3</sub>@C.

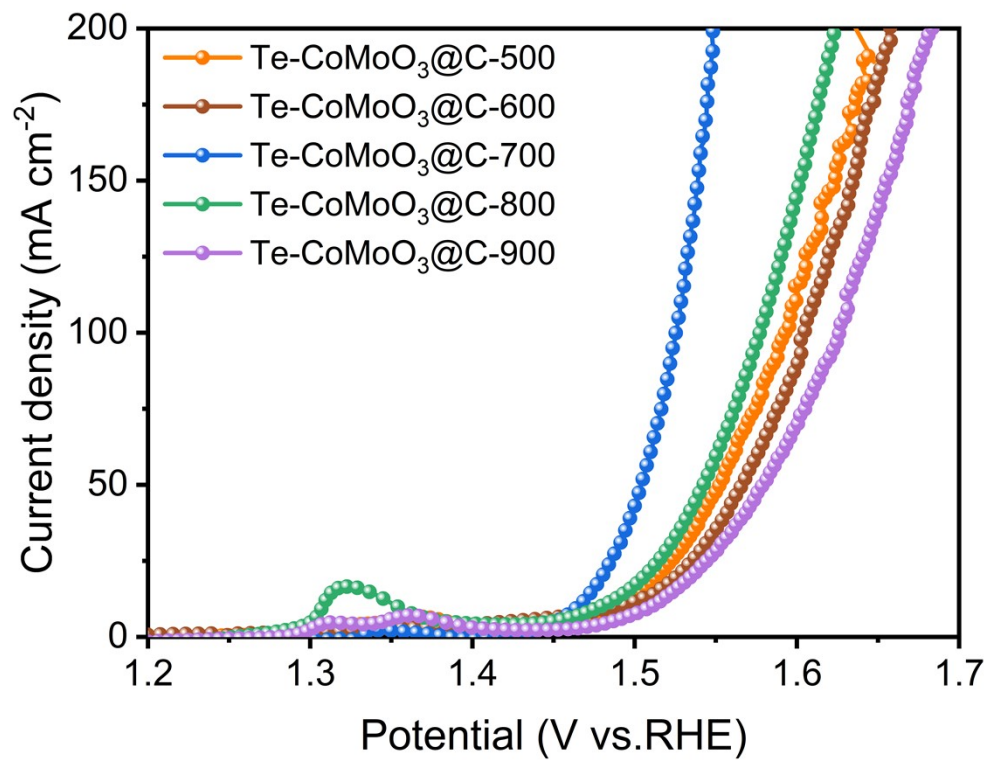

**Fig. S12.** OER performances of Te-CoMoO<sub>3</sub>@C catalysts obtained under different temperatures.

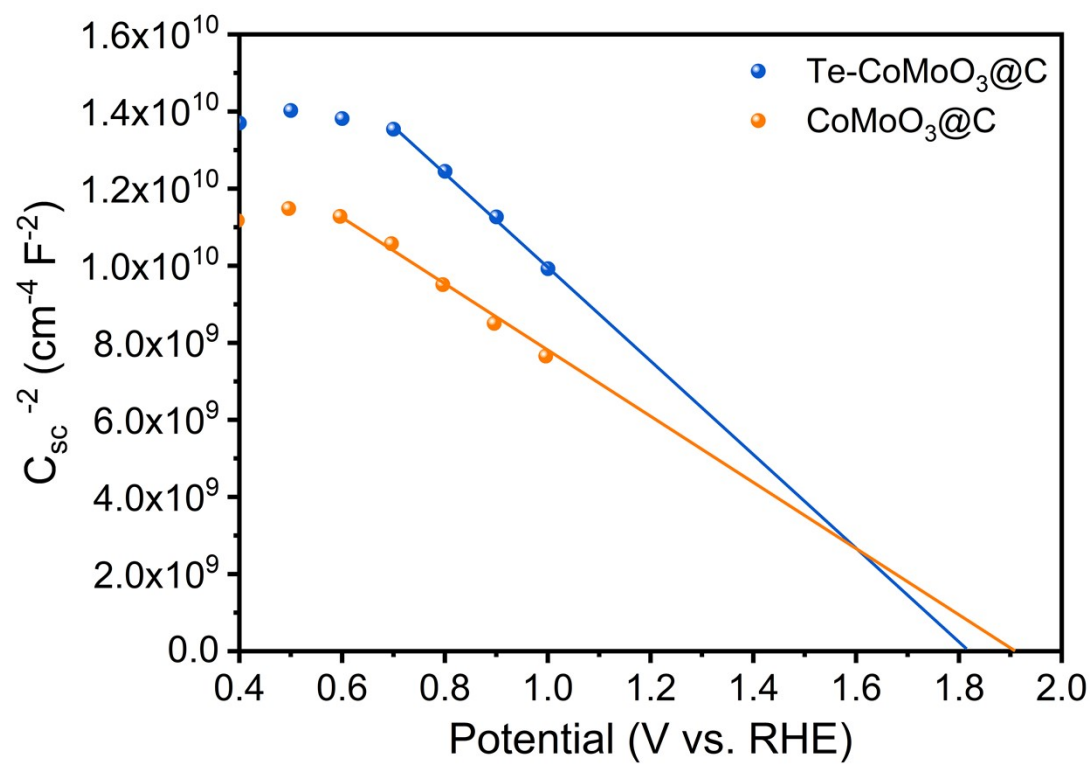

**Fig. S13.** Mott-Schottky curves of CoMoO<sub>3</sub>@C and Te-CoMoO<sub>3</sub>@C.

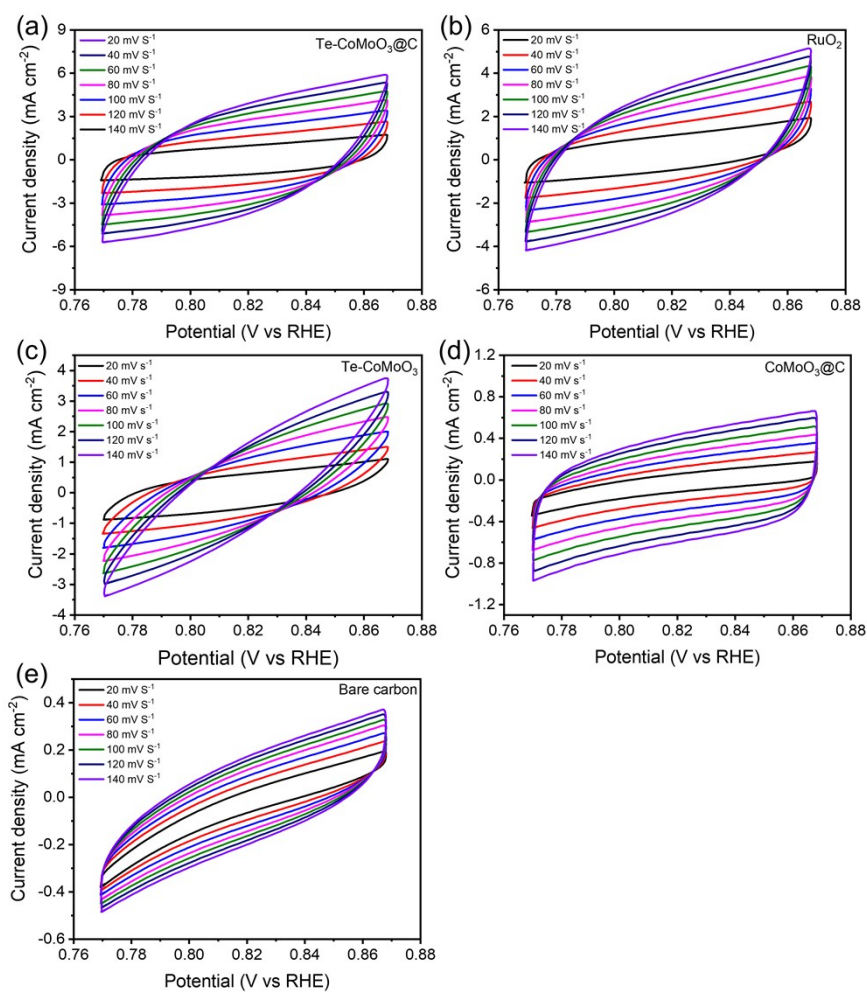

**Fig. S14.** Cyclic voltammograms of different samples from 20 to 140 mV s<sup>-1</sup> between 0.77 and 0.87 V.

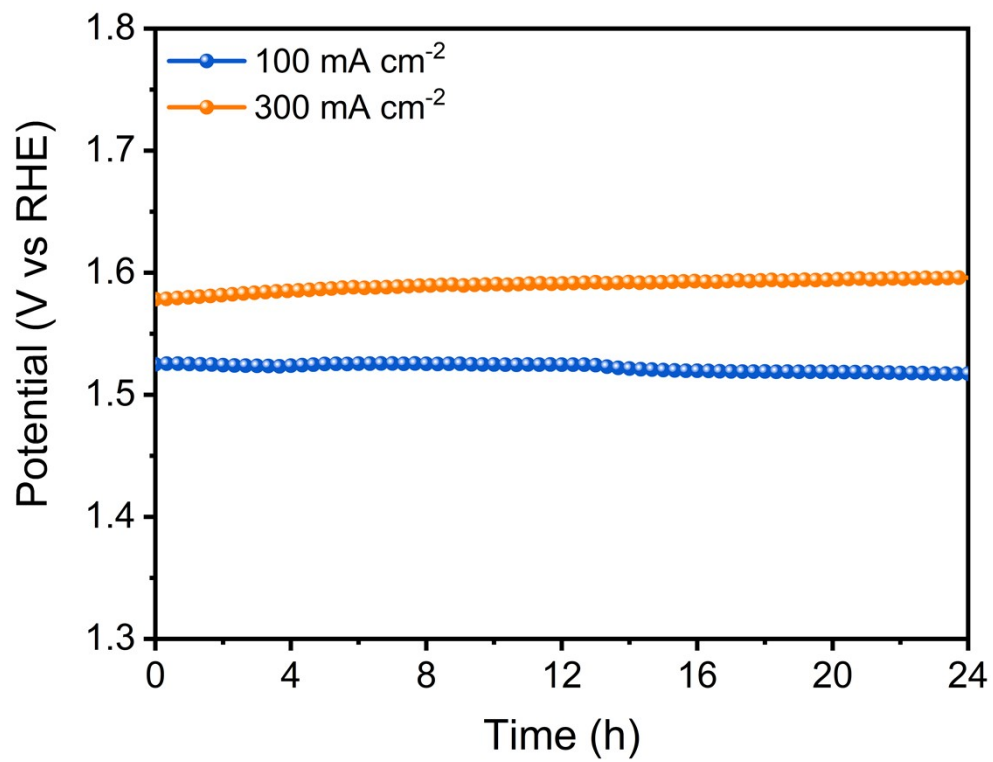

**Fig. S15.** Chronopotentiometry curves of Te-CoMoO<sub>3</sub>@C during OER process.



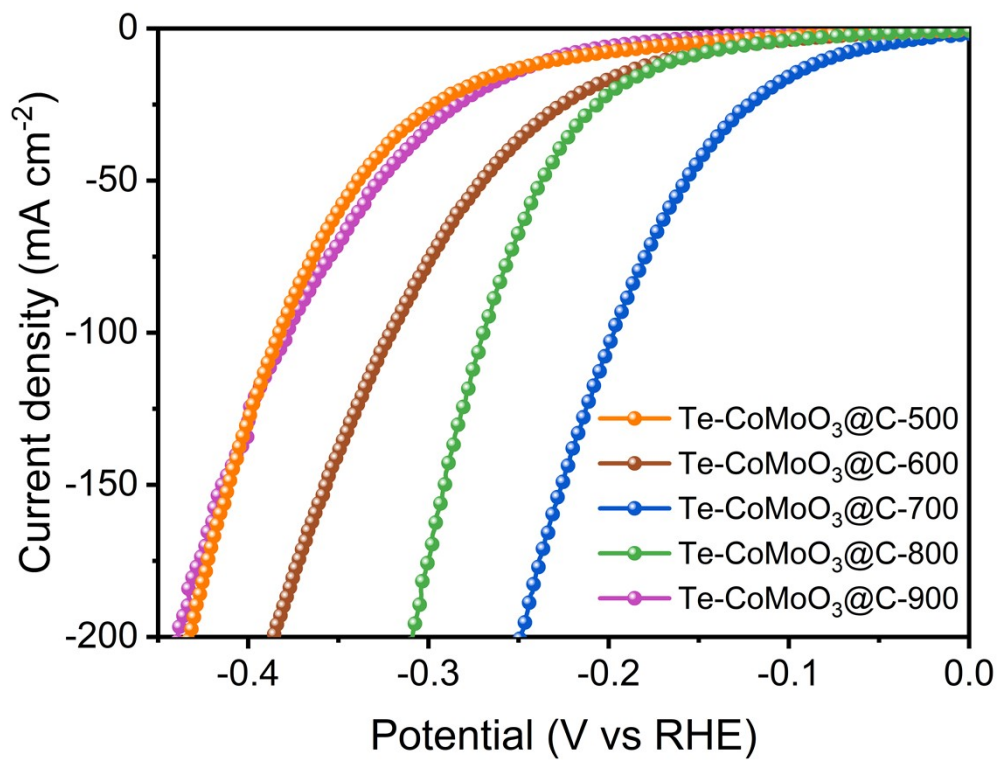

**Fig. S16.** HER performances of Te-CoMoO<sub>3</sub>@C catalysts obtained under different temperatures.

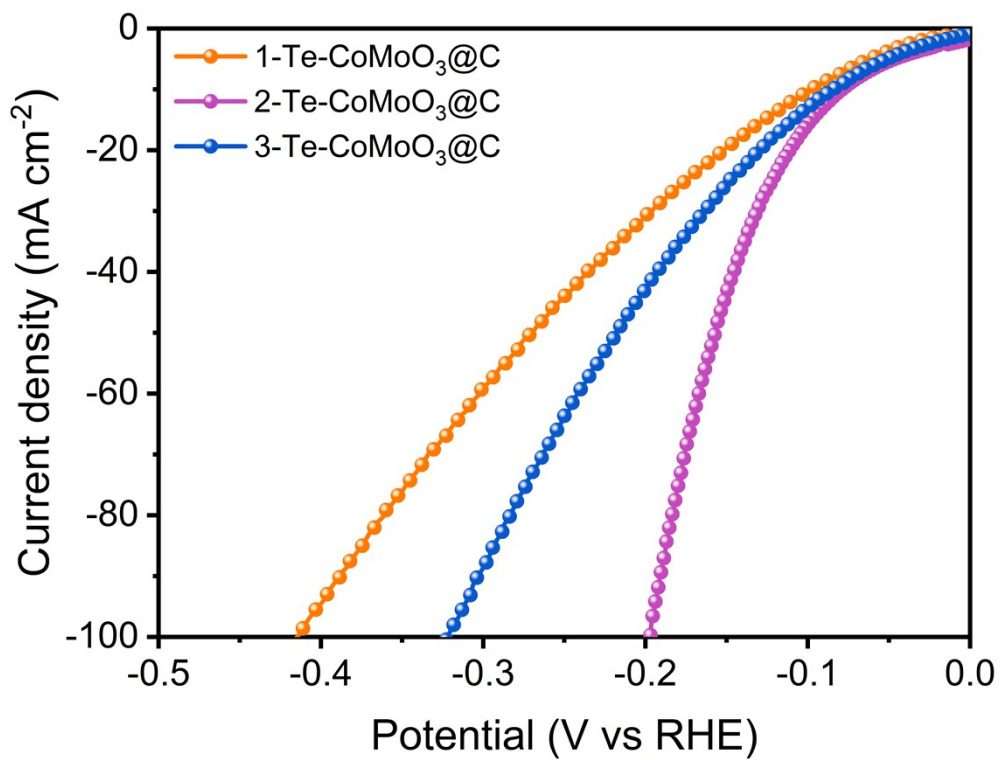

**Fig. S17.** HER performances of 1-Te-CoMoO<sub>3</sub>@C, 2-Te-CoMoO<sub>3</sub>@C, and 3-Te-CoMoO<sub>3</sub>@C.

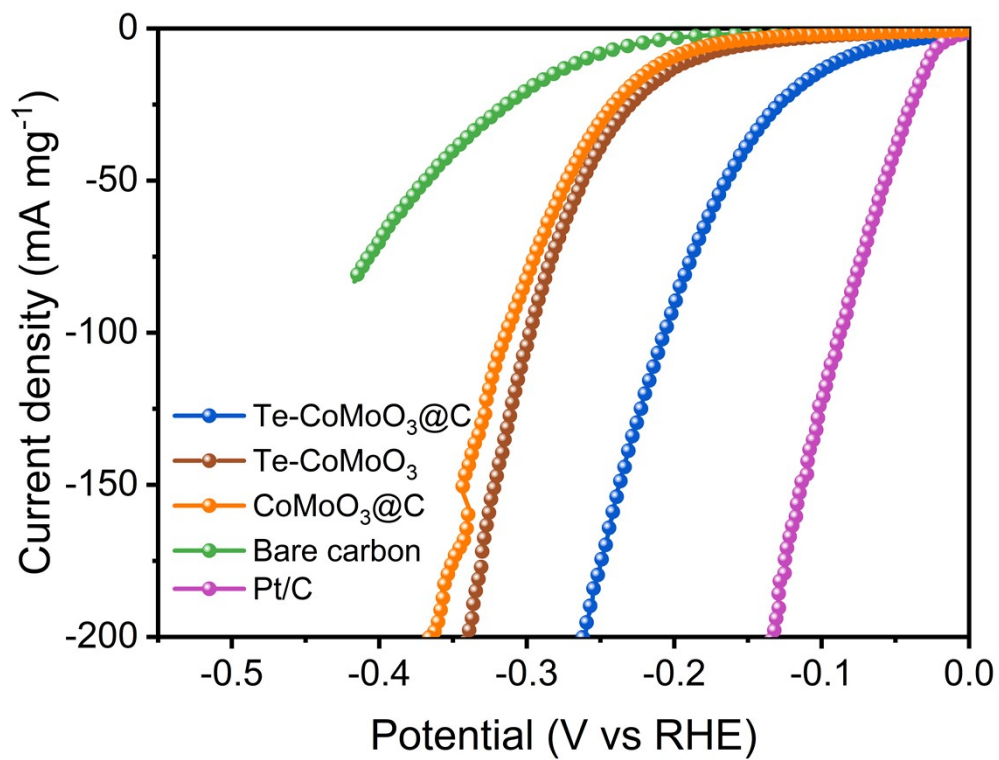

**Fig. S18.** HER LSV polarization curves normalized to catalyst loading of Pt/C, bare carbon, CoMoO<sub>3</sub>@C, Te-CoMoO<sub>3</sub> and Te-CoMoO<sub>3</sub>@C.

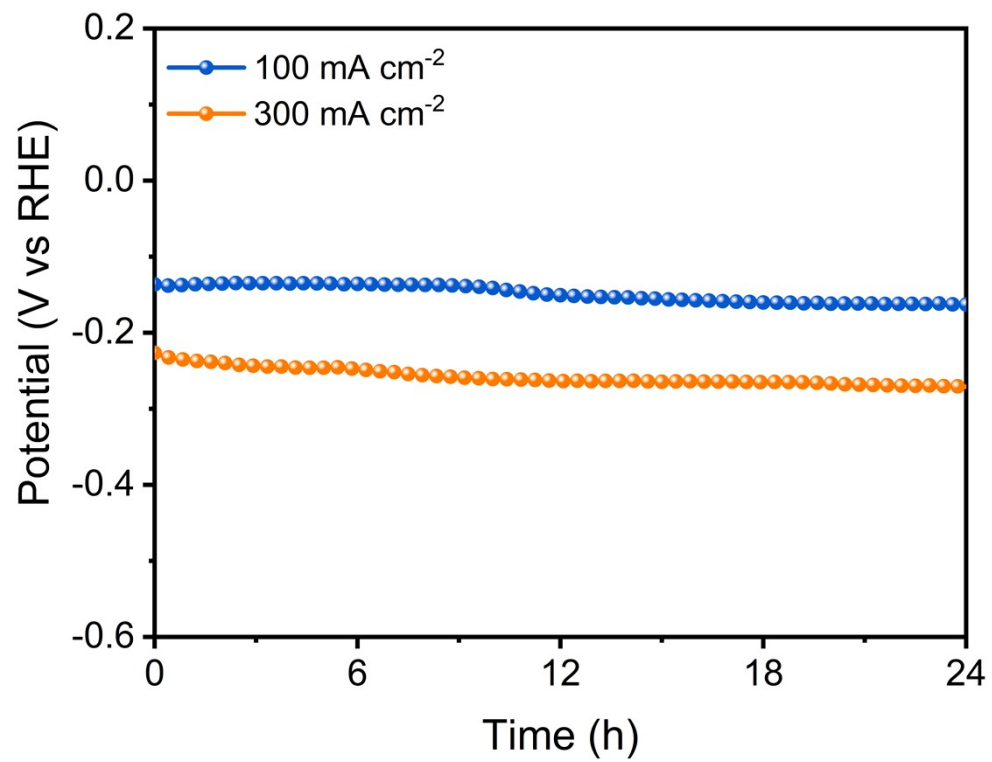

**Fig. S19.** Chronopotentiometry curves of Te-CoMoO<sub>3</sub>@C during HER process.

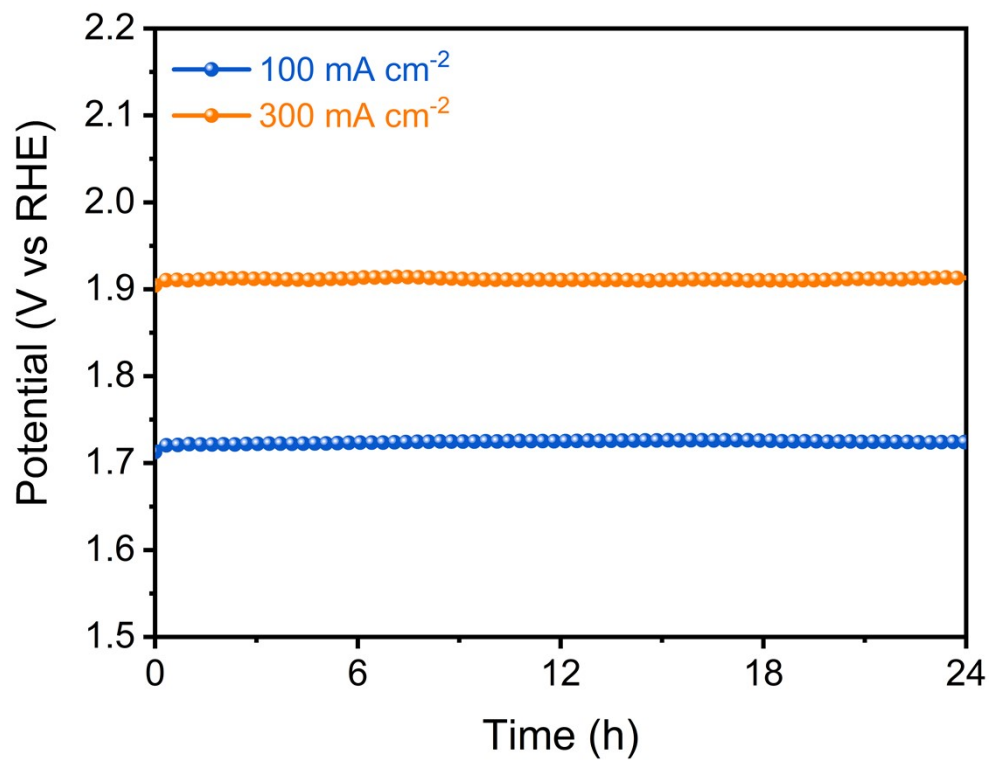

**Fig. S20.** Chronopotentiometry curves of Te-CoMoO<sub>3</sub>@C during overall water splitting process.

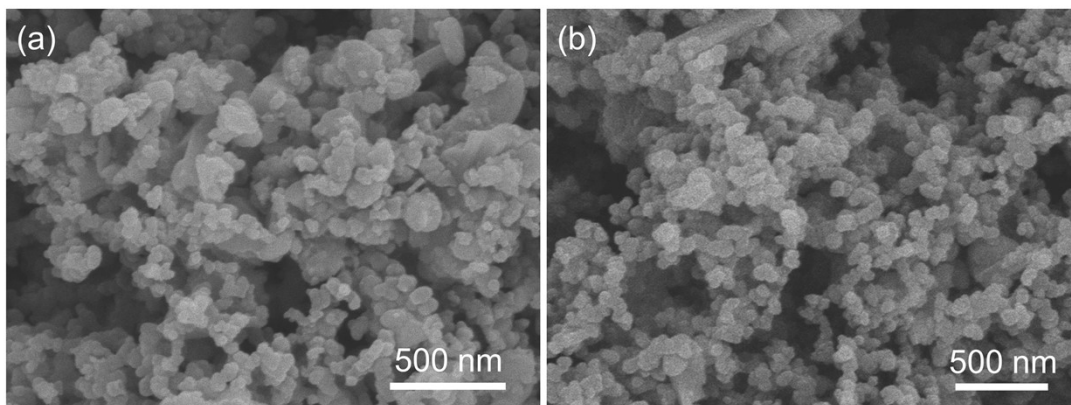

**Fig. S21.** SEM images of Te-CoMoO<sub>3</sub>@C after OER (a) and (b) HER cycling tests.

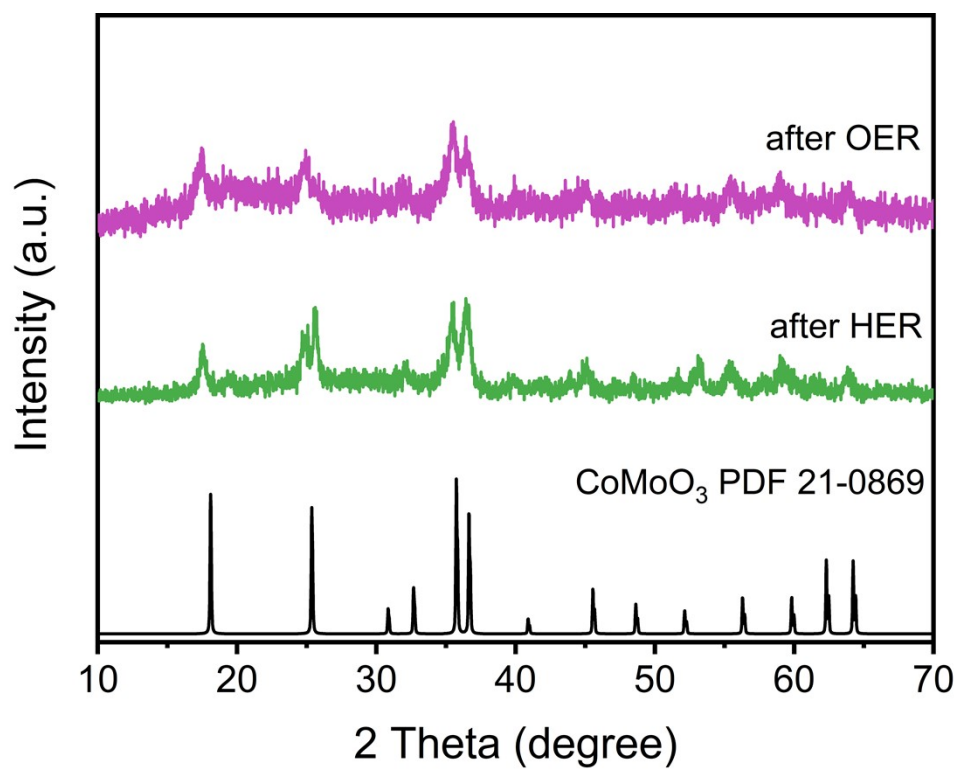

**Fig. S22.** XRD patterns of Te-CoMoO<sub>3</sub>@C after water splitting cycling tests.

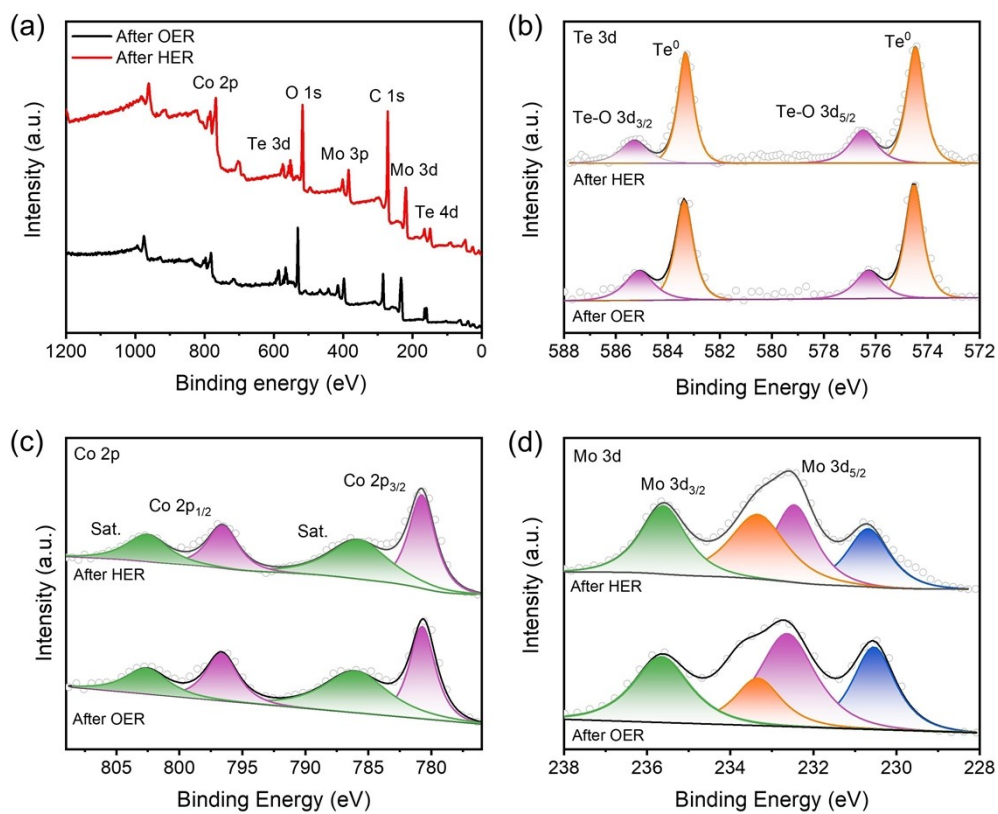

**Fig. S23.** (a) XPS survey spectra and high-resolution XPS spectra of (b) Te 3d, (c) Co 2p, and (d) Mo 3d for Te-CoMoO<sub>3</sub>@C after water splitting cycling tests.



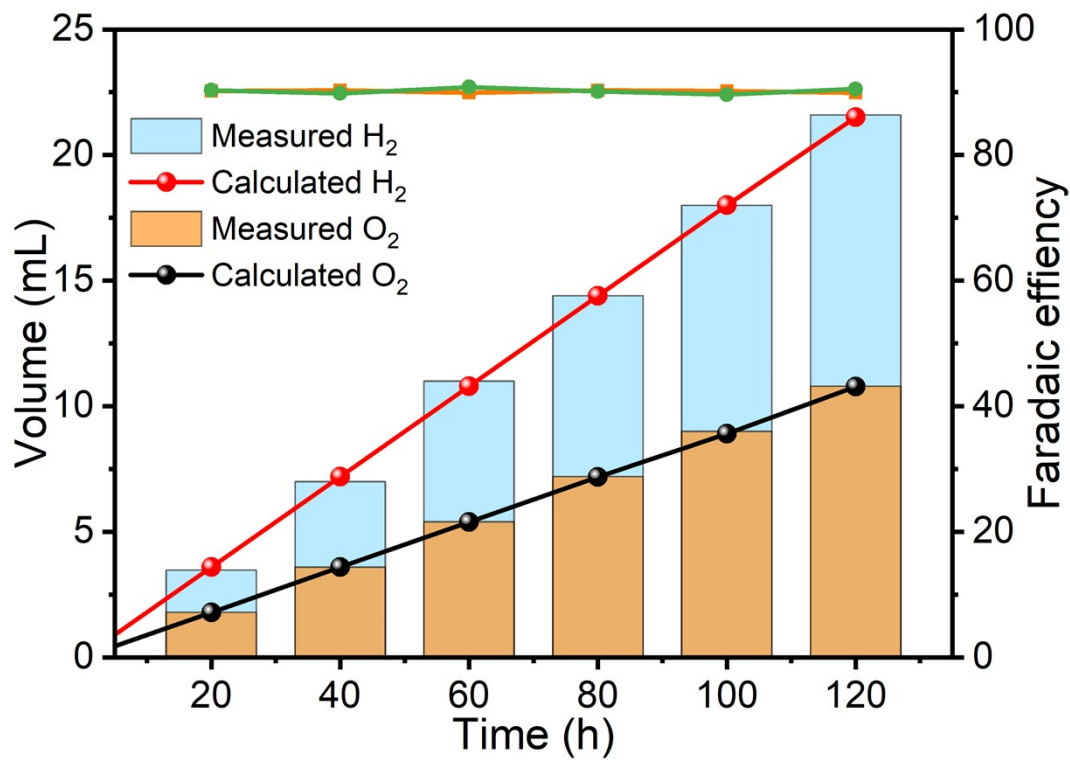

**Fig. S24.** Amount of hydrogen theoretically calculated and experimentally measured and the Faradaic efficiency.

**Table S1.** Inductive Coupled Plasma (ICP) results of prepared samples.

| Samples                  | Te (wt.%) | Co (wt.%) | Mo (wt.%) |
|--------------------------|-----------|-----------|-----------|
| Te-CoMoO <sub>3</sub> @C | 0.83      | 4.67      | 18.32     |

**Table S2.** The fitting parameters of the XPS spectra of O2p for Te-CoMoO<sub>3</sub>@C and CoMoO<sub>3</sub>@C.

| Sample                   | Peak           | Position | peak area |
|--------------------------|----------------|----------|-----------|
| Te-CoMoO <sub>3</sub> @C | M-O            | 530.42   | 11705.17  |
|                          | O <sub>v</sub> | 531.13   | 6338.04   |
|                          | H-O-H          | 532.84   | 5005.15   |
| CoMoO <sub>3</sub> @C    | M-O            | 530.51   | 51536.50  |
|                          | O <sub>v</sub> | 531.25   | 3896.50   |
|                          | H-O-H          | 532.77   | 16536.50  |

**Table S3.** OER Fitting results of EIS for Te-CoMoO<sub>3</sub>/C, Te-CoMoO<sub>3</sub>, CoMoO<sub>3</sub>/C, bare carbon, and RuO<sub>2</sub>.

| Catalysts                | Rs (ohm) | Rct (ohm) | Error (%) |
|--------------------------|----------|-----------|-----------|
| Te-CoMoO <sub>3</sub> @C | 1.181    | 3.042     | 0.692     |
| Te-CoMoO <sub>3</sub>    | 1.326    | 4.683     | 0.688     |
| CoMoO <sub>3</sub> @C    | 1.558    | 6.919     | 0.795     |
| Bare carbon              | 1.841    | 13.59     | 0.764     |
| RuO <sub>2</sub>         | 1.294    | 3.545     | 0.748     |

**Table S4.** Comparison of overpotential (10 mA cm<sup>-2</sup>) and Tafel slopes for OER between Te-CoMoO<sub>3</sub>@C and various reported catalysts.

| Catalysts                                                             | Overpotential (mV) 10 mA cm <sup>-2</sup> | Tafel slope (mV dec <sup>-1</sup> ) | Reference                                           |
|-----------------------------------------------------------------------|-------------------------------------------|-------------------------------------|-----------------------------------------------------|
| <b>Te-CoMoO<sub>3</sub>@C</b>                                         | <b>218</b>                                | <b>39</b>                           | <b>This work</b>                                    |
| Te/FeNiOOH-NC                                                         | 220                                       | 52                                  | ACS Appl. Mater. Interfaces. 2021, 13, 10972-10978. |
| GB-(Fe <sub>0.66</sub> Co <sub>0.34</sub> ) <sub>2</sub> B/RGO        | 221                                       | 39                                  | Appl. Catal. B Environ. 2020, 305, 121034.          |
| Ta-NiFe LDH                                                           | 228                                       | 58.95                               | Chem. Eng. J. 2021, 403, 126297.                    |
| Co <sub>1.6</sub> Ni <sub>0.4</sub> P <sub>4</sub> O <sub>12</sub> -C | 230                                       | 51.1                                | Adv. Funct. Mater. 2020, 30, 1910498.               |
| Ni-MnO <sub>2</sub>                                                   | 233                                       | 36                                  | Adv. Energy Mater. 2020, 10, 2001059.               |
| V-NiCoP                                                               | 234                                       | 35                                  | J. Mater. Chem. A. 2021, 9, 12203-12213.            |
| Fe <sub>0.9</sub> Ni <sub>2.1</sub> S <sub>2</sub> @NF                | 235                                       | 64                                  | Adv. Energy Mater. 2020, 10, 2001963.               |
| Ni-Mo-P                                                               | 235                                       | 108.4                               | Appl. Catal. B Environ. 2021, 298,                  |

|                                                                   |     |       |                                              |
|-------------------------------------------------------------------|-----|-------|----------------------------------------------|
|                                                                   |     |       | 120494.                                      |
| Mo-Ni <sub>3</sub> S <sub>2</sub> /Ni <sub>x</sub> P <sub>y</sub> | 236 | 60.6  | Adv. Energy Mater. 2020, 10, 1903891.        |
| S-NiFe-LDH-9-A                                                    | 240 | 42    | Appl. Catal. B Environ. 2021, 292, 120150.   |
| o-CoTe <sub>2</sub>  P@HPC/CNTs                                   | 241 | 46    | ACS Nano. 2020, 14, 6968-6979.               |
| Fe, Ni-CoS <sub>2</sub>                                           | 242 | 35    | ACS Catal. 2022, 12, 3743-3751.              |
| 30%Ce-NiFe-LDH                                                    | 242 | 32    | Energy Environ. Sci. 2020, 13, 2949-2956.    |
| Ti-CoS <sub>x</sub> HSS                                           | 249 | 48.3  | Small. 2022, 18, 2103106.                    |
| CoOOH-W <sub>D</sub> -Co <sub>V</sub>                             | 251 | 46.1  | Adv. Mater. 2022, 34, 2104667.               |
| Fe <sub>x</sub> Ni <sub>3-x</sub> S <sub>2</sub> @NF              | 252 | 64    | Adv. Energy Mater. 2020, 10, 2001963.        |
| NiNCs-1T-Mn-VTe <sub>2</sub> NS                                   | 258 | 65.11 | Appl. Catal. B Environ. 2022, 301, 120780.   |
| 0.5Fe-NiCo <sub>2</sub> O <sub>4</sub> @CC                        | 258 | 63.5  | Small. 2022, 18, 2106187.                    |
| Co, Nb-MoS <sub>2</sub> /TiO <sub>2</sub> HSSs                    | 260 | 65    | Nano Energy. 2021, 82, 105750.               |
| Fe-Co <sub>3</sub> O <sub>4</sub> HHNPs                           | 262 | 43    | Adv. Mater. 2020, 32, 2002235.               |
| Fe <sub>0.4</sub> Co <sub>0.6</sub> Se <sub>2</sub>               | 270 | 36    | Energy Environ. Sci. 2021, 14, 365-373.      |
| N-CoS <sub>2</sub> SSs                                            | 278 | 56    | Adv. Sci. 2020, 7, 2001178.                  |
| Fe-NiSe NSs/CNTs                                                  | 282 | 61    | J. Mater. Chem. A. 2022, 10, 3102-3111.      |
| P-Co <sub>3</sub> O <sub>4</sub>                                  | 283 | 85.3  | Adv. Energy Mater. 2021, 11, 2100358.        |
| Co <sub>2</sub> Mo <sub>3</sub> O <sub>8</sub>                    | 290 | 87.5  | Angew. Chem. Int. Ed. 2020, 59, 11948-11957. |
| W-NiCoP/NF                                                        | 295 | 99    | Appl. Mater. Today. 2021, 24, 101154.        |
| Fe-Mo/Te-2                                                        | 300 | 45.6  | Chem. Eng. J. 2021, 423, 130168.             |
| Te-Co <sub>3</sub> O <sub>4</sub>                                 | 313 | 75    | Int. J. Energy Res. 2021, 10, 1-10.          |

**Table S5.** HER fitting results of EIS for Te-CoMoO<sub>3</sub>@C, Te-CoMoO<sub>3</sub>, CoMoO<sub>3</sub>@C, bare carbon, and Pt/C.

| Catalysts                | Rs (ohm) | Rct (ohm) | Error (%) |
|--------------------------|----------|-----------|-----------|
| Te-CoMoO <sub>3</sub> @C | 1.264    | 5.162     | 0.609     |
| Te-CoMoO <sub>3</sub>    | 1.402    | 6.532     | 0.701     |
| CoMoO <sub>3</sub> @C    | 1.573    | 7.215     | 0.651     |
| Bare carbon              | 1.728    | 11.36     | 0.770     |
| Pt/C                     | 1.153    | 3.531     | 0.686     |

**Table S6.** The comparison of water splitting performances of Te-CoMoO<sub>3</sub>@C and other catalysts in the literature.

| Catalysts                                         | Overpotential (mV)<br>10 mA cm <sup>-2</sup> | Stability (h) | Reference                                  |
|---------------------------------------------------|----------------------------------------------|---------------|--------------------------------------------|
| <b>Te-CoMoO<sub>3</sub>@C</b>                     | <b>1.54</b>                                  | <b>100</b>    | <b>This work</b>                           |
| DV-MnO <sub>2</sub>                               | 1.55                                         | 100           | Adv. Funct. Mater. 2021, 31, 2010718.      |
| Fe-Ni <sub>5</sub> P <sub>4</sub> /NiFeOH-350     | 1.55                                         | 20            | Appl. Catal. B Environ. 2021, 291, 119987. |
| V-NiCoP                                           | 1.56                                         | 56            | J. Mater. Chem. A. 2021, 9, 12203-12213.   |
| WN-Ni@ N, P-CNT-800                               | 1.57                                         | 10            | Appl. Catal. B Environ. 2021, 298, 120511. |
| Fe-doped NiSe NSs/CNTs                            | 1.57                                         | 24            | J. Mater. Chem. A. 2022, 10, 3102-3111.    |
| Co, Nb-MoS <sub>2</sub> /TiO <sub>2</sub> HSs     | 1.57                                         | 60            | Nano Energy. 2021, 82, 105750.             |
| E-Mo-NiCoP-3                                      | 1.58                                         | 48            | Nano-Micro Letters. 2019, 11, 55.          |
| P-Co <sub>3</sub> O <sub>4</sub>                  | 1.6                                          | 60            | Adv. Energy Mater. 2021, 11, 2100358.      |
| Ni-Fe-K <sub>0.23</sub> MnO <sub>2</sub> CNFs-300 | 1.62                                         | 24            | Small. 2020, 16, 1905223.                  |
| Mn-CoP@ Mn-CoOOH                                  | 1.64                                         | 24            | Appl. Catal. B Environ. 2021, 292, 120172. |

**Table S7.** Overall water splitting fitting results of EIS for Te-CoMoO<sub>3</sub>@C, Te-CoMoO<sub>3</sub>, CoMoO<sub>3</sub>@C, bare carbon, and Pt/C||RuO<sub>2</sub>.

| Catalysts                | Rs (ohm) | Rct (ohm) | Error (%) |
|--------------------------|----------|-----------|-----------|
| Te-CoMoO <sub>3</sub> @C | 1.035    | 2.435     | 0.863     |
| Te-CoMoO <sub>3</sub>    | 1.468    | 8.536     | 1.328     |
| CoMoO <sub>3</sub> @C    | 1.657    | 10.368    | 1.143     |
| Bare carbon              | 1.983    | 14.723    | 0.953     |
| Pt/C  RuO <sub>2</sub>   | 1.172    | 3.879     | 1.035     |
